# Supplementary material for: Development and characterization of patient-derived xenografts from non-small cell lung cancer brain metastases
Source: PubMed Central journal article supplement (PMC7843608; doi:10.1038/s41598-021-81832-1), 2021-01-28
Supplement: 41598_2021_81832_MOESM1_ESM.pdf [file 41598_2021_81832_MOESM1_ESM.pdf]

## **Development and Characterization of Patient-Derived Xenografts from Non-Small Cell Lung Cancer Brain Metastases**

Andrew M. Baschnagel, M.D.,<sup>1,2</sup> Saakshi Kaushik, M.S.,<sup>1</sup> Arda Durmaz, M.S.,<sup>3</sup> Steve Goldstein, Ph.D.,<sup>2,4</sup> Irene M. Ong, Ph.D.,<sup>2,4,5</sup> Lindsey Abel, B.S.,<sup>1</sup> Paul A. Clark, Ph.D.,<sup>1</sup> Zafer Gurel, Ph.D.<sup>1</sup> Ticiana Leal, M.D.,<sup>2,6</sup> Darya Buehler, M.D.,<sup>2,7</sup> Gopal Iyer, Ph.D.,<sup>1,2</sup> Jacob G. Scott, M.D., D.Phil.,<sup>8</sup> Randall J. Kimple, M.D., Ph.D.<sup>1,2</sup>

1. Department of Human Oncology, School of Medicine and Public Health, University of Wisconsin, Madison, WI, USA
2. University of Wisconsin Carbone Cancer Center, School of Medicine and Public Health, University of Wisconsin, Madison, WI, USA
3. Case Western Reserve University, Cleveland, OH 44195, USA
4. Department of Biostatistics and Medical Informatics, University of Wisconsin School of Medicine and Public Health, University of Wisconsin, Madison, WI, USA
5. Department of Obstetrics and Gynecology, University of Wisconsin School of Medicine and Public Health, University of Wisconsin, Madison, WI, USA
6. Department of Medicine, Division of Hematology/Oncology, School of Medicine and Public Health, University of Wisconsin, Madison, WI, USA
7. Department of Pathology and Laboratory Medicine, University of Wisconsin School of Medicine and Public Health, University of Wisconsin, Madison, WI, USA
8. Department of Radiation Oncology, Taussig Cancer Institute, Cleveland Clinic, 10201 Carnegie Ave, Cleveland, OH 44195, USA

## **Supplemental Materials**

Supplemental Methods: Immunohistochemistry Antibodies used in this study

Supplemental Table 1: Detailed molecular profile of brain metastases

Supplemental Table 2: Short tandem repeat analysis

Supplemental Table 3: KEGG (Kyoto Encyclopedia of Genes and Genomes) Pathways

Supplemental Table 4: Gene Ontology Terms

## Supplemental Methods

Immunohistochemistry antibodies used in this study

| <b>Antibody</b>                                 | <b>Source</b> | <b>Company</b>            | <b>Catalog no.</b> | <b>Dilutions</b> |
|-------------------------------------------------|---------------|---------------------------|--------------------|------------------|
| TTF-1 (SPT24)                                   | Mouse         | BioCare                   | ACI3126C           | 1:100            |
| Ki-67 (D2H10)                                   | Rabbit        | Cell Signaling            | 9027               | 1:400            |
| phospho-p44/42 MAPK<br>(Erk1/2) (Thr202/Tyr204) | Rabbit        | Cell Signaling Technology | 4370               | 1:200            |
| phospho-S6 Ribosomal<br>Protein (Ser235/236)    | Rabbit        | Cell Signaling Technology | 4858               | 1:400            |
| MET (D1C2)                                      | Rabbit        | Cell Signaling Technology | 8198               | 1:320            |
| Phospho-Met<br>(Tyr1234/1235)                   | Rabbit        | Cell Signaling Technology | 3077               | 1:320            |

**Supplemental Table 1: Detailed molecular profile of brain metastases**

| PDX#      | PDX Success | Histology      | PD-L1 expression | Tumor Mutation Burden | Mutation Profile                                                                                                                                                                                                                                                    |
|-----------|-------------|----------------|------------------|-----------------------|---------------------------------------------------------------------------------------------------------------------------------------------------------------------------------------------------------------------------------------------------------------------|
| UW-lung-1 | no          | adenocarcinoma | <1%              |                       | ERBB2 A775_G776insYVMA amplification- equivocal<br>AURKA amplification- equivocal<br>NFKBIA amplification<br>NKX2-1 amplification<br>ZNF217 amplification                                                                                                           |
| UW-lung-2 | yes         | adenocarcinoma | 70%              | 19 Muts/Mb            | KRAS G12C<br>TP53 splice site 994-2A>T<br>CDKN2A p16INK4a E119*<br>p14ARF *133Lext*23<br>RBM10 splice site 1575+1G>C<br>SMARCA4 1548G>C,<br>2735_2736delGCinsTG<br>ATM 4626G>C<br>KEAP1 599A>C<br>NFKBIA amplification<br>NKX2-1 amplification<br>MYC amplification |
| UW-lung-3 | yes         | adenocarcinoma | 20%              |                       | NOTCH4 1099G>T<br>PLCG2 3616C>T<br>KMT2D 10993C>G                                                                                                                                                                                                                   |
| UW-lung-4 | yes         | adenocarcinoma | 15%              | 25 Muts/Mb            | KRAS G12V 35G>T<br>ATM splice variant 3285-2A>T<br>FBXW7 337_339delGAG<br>NFE2L2 101G>A<br>RBM10 1285C>T<br>SF3B1 1998G>T<br>GNAQ 943G>T<br>JAK2 1993G>C<br>LRP1B 10532-16_10532-15insT,<br>2966C>A<br>PIK3C2B 260C>G<br>KMT2D 9557G>T                              |
| UW-lung-5 | yes         | adenocarcinoma | <1%              | 9 Muts/Mb             | KRAS G12C 34G>T<br>STK11 splice site 465-2A>T<br>CDKN2A loss<br>IGF1R amplification – equivocal<br>KEAP1 splice site 1708+1G>T                                                                                                                                      |
| UW-lung-6 | no          | adenocarcinoma | <1%              | high                  | TP53 W146fs*3<br>EGFR amplification<br>RICTOR amplification<br>ARID2 P1377fs*9<br>BCORL1 splice site 4697-2A>G<br>DNMT3A truncation intron 22<br>FGF10 amplification<br>GATA1 S30                                                                                   |
| UW-lung-7 | yes         | adenocarcinoma | 50%              |                       | TP53 379T>C, 718A>G – subclonal<br>DNMT3A 2478+13G>A<br>KMT2D 4021-15_4021-14delCT                                                                                                                                                                                  |

|                   |     |                                                     |      |             |                                                                                                                                                                                                                     |
|-------------------|-----|-----------------------------------------------------|------|-------------|---------------------------------------------------------------------------------------------------------------------------------------------------------------------------------------------------------------------|
|                   |     |                                                     |      |             | AKT2 amplification<br>CCNE1 amplification                                                                                                                                                                           |
| <b>UW-lung-8</b>  | no  | adenocarcinoma                                      | 2%   | 11 Muts/Mb  | KRAS G12V<br>STK11 M129fs*32<br>TP53 splice site 375G>T<br>CRKL amplification<br>EP300 A1629V<br>GATA4 loss exons 3-7<br>NFKBIA amplification<br>NKX2-1 amplification                                               |
| <b>UW-lung-9</b>  | no  | adenocarcinoma                                      | <1%  |             | NOTCH4 1099G>T<br>PLCG2 3616C>T<br>KMT2D 0993C>G                                                                                                                                                                    |
| <b>UW-lung-10</b> | no  | adenocarcinoma                                      |      |             | TP53 2049C>T<br>KMT2D c.4003delT<br>AKT3 c.819+1G>A<br>PDGFRA c.2339delA                                                                                                                                            |
| <b>UW-lung-16</b> | yes | adenocarcinoma                                      | <1%  |             | KRAS G12C 34g>T<br>TP53 R213* 637C>T<br>STK11 40delG frameshift<br>CDKN2A 322G>A<br>APC 1240C>T<br>CHEK2 1556C>T<br>MTOR 3676G>C, 1198G>A<br>PIK3CA 733G>C<br>KEAP1 679C>T stop gained                              |
| <b>UW-lung-18</b> | yes | adenocarcinoma                                      | 35%  |             | KRAS G13C 37G>T<br>TP53 C135Y 404G>A<br>KDR 3872G>T, 2516C>A<br>RAD54L 604C>T<br>KEAP1 1435G>T                                                                                                                      |
| <b>UW-lung-20</b> | yes | sarcomatoid carcinoma with adenocarcinoma component | 100% | 9.2 Muts/Mb | TP53 c.376-2A>t Splice region Variant - LOF<br>TP53 p.R2495 Missense variant-LOF<br>CKS1B copy number gain<br>CDKN2A 206A>G<br>BCL6 729_731dupCAG<br>ARID2 3151C>T, 3337G>T<br>HGF 685G>T<br>MET Asp1000 frameshift |
| <b>UW-lung-21</b> | yes | adenocarcinoma                                      | 100% |             | MET exon 14 deletion<br>MET exon 14 splice site mutation<br>TP53 1025G>C<br>CCND1 amp 7<br>CDKN2A 206A>G<br>TERT 228C>T                                                                                             |

PD-L1, programmed death-ligand 1; PDX, patient-derived xenograft; UW, University of Wisconsin

**Supplemental Table 2: Short tandem repeat analysis**

| Sites tested  | UW-lung-2 |          |          |          |          | UW-lung-3  |          |          | UW-lung-4 |        |        | UW-lung-5 |        |        | UW-lung-7 |            |            | UW-lung-16 |        |                |        |               | UW-lung-18 |           |        | UW-lung-20 |          |          | UW-lung-21 |          |          |        |        |        |
|---------------|-----------|----------|----------|----------|----------|------------|----------|----------|-----------|--------|--------|-----------|--------|--------|-----------|------------|------------|------------|--------|----------------|--------|---------------|------------|-----------|--------|------------|----------|----------|------------|----------|----------|--------|--------|--------|
|               | P0        | P1       | P5       | Brain    | Cells P9 | P0         | P1       | P5       | P0        | P1     | P5     | P0        | P2     | P5     | P0        | P2         | P5         | P0         | P1     | P5             | Brain  | Cells P15     | P0         | P1        | P5     | P0         | P1       | P5       | P0         | P1       | P5       | P0     | P1     | P5     |
| D3S1358       | 16        | 16       | 16       | 16       | 16       | 16, 17     | 17       | 17       | 15        | 15     | 15     | 14, 15    | 14     | 14     | 16, 17    | 16, 17     | 16, 17     | 17         | 17     | 16, 17         | 15, 17 | 15, 17        | 15, 16     | 15        | 15     | 17, 18     | 17, 18   | 17, 18   | 16         | 16       | 16       |        |        |        |
| D21S11        | 29, 32.2  | 29, 32.2 | 29, 32.2 | 29, 32.2 | 29, 32.2 | 28, 31.2   | 28, 31.2 | 28, 31.2 | 28, 29    | 28, 29 | 28, 29 | 30, 31.2  | 31.2   | 31.2   | 28, 31.2  | 31.2       | 31.2       | 29, 30     | 30     | 29, 30, 32.2   | 30     | 30, 32.2      | 30, 32.2   | 30, 32.2  | 32.2   | 28, 33.2   | 28, 33.2 | 28, 33.2 | 29, 30     | 29, 30   | 29, 30   |        |        |        |
| D18S51        | 16        | 16       | 16       | 16       | 16       | 13         | 13       | 13       | 12, 17    | 12, 17 | 12, 17 | 17, 20    | 20     | 20     | 13        | 13         | 13         | 12         | 12     | 12, 16         | 12, 13 | 12, 13        | 13         | 13        | 13     | 13, 17     | 13, 17   | 17       | 15, 21     | 21       | 21       |        |        |        |
| Penta E       | 7, 12     | 7        | 7        | 7        | 7        | 10, 12     | 9, 10    | 9, 10    | 5, 15     | 5, 15  | 5, 15  | 7, 10     | 7, 10  | 7, 10  | 5, 13     | 5, 13      | 5, 13      | 13, 16     | 13, 16 | 7, 13, 16      | 13, 16 | 7, 11, 13, 16 | 7, 11      | 7, 11     | 7, 11  | 7, 16      | 7, 16    | 7, 16    | 8, 15      | 8, 15    | 8, 15    |        |        |        |
| Penta D       | 13, 14    | 13, 14   | 13, 14   | 13, 14   | 13, 14   | 11, 12     | 11, 12   | 11, 12   | 9, 11     | 9, 11  | 9, 11  | 9, 10     | 9      | 9      | 11, 12    | 11         | 11         | 8, 12      | 8, 12  | 8, 12, 13, 14  | 8, 12  | 8, 12         | 12         | 12        | 12     | 10, 13     | 10, 13   | 10, 13   | 12, 14     | 12, 14   | 12, 14   |        |        |        |
| D8S1179       | 10, 13    | 10, 13   | 10, 13   | 10, 13   | 10, 13   | 12, 13, 14 | 13, 14   | 13, 14   | 10, 12    | 10, 12 | 10, 12 | 13, 14    | 13, 14 | 13, 14 | 12, 15    | 12, 15, 16 | 12, 15, 16 | 12, 14     | 12, 14 | 10, 12, 13, 14 | 12, 14 | 12, 14        | 12, 14     | 12, 14    | 12, 14 | 12, 14     | 12, 14   | 12, 14   | 11, 13     | 11, 13   | 11, 13   | 12, 16 | 12, 16 | 12, 16 |
| FGA           | 22, 24    | 22, 24   | 22, 24   | 22, 24   | 22, 24   | 22, 23, 24 | 22, 23   | 22, 23   | 23, 25    | 23, 25 | 23, 25 | 21, 23    | 23     | 23     | 19, 23    | 19, 20, 22 | 19, 20, 22 | 21, 26     | 21, 26 | 21, 22, 24, 26 | 21, 26 | 21, 26        | 21, 22     | 21        | 21     | 20         | 20       | 20       | 21, 21.2   | 21, 21.2 | 21, 21.2 |        |        |        |
| D5S818        | 11, 12    | 11       | 11       | 11       | 11       | 11         | 11       | 11       | 11        | 11     | 11     | 11, 13    | 11     | 11     | 11, 12    | 11, 12     | 11, 12     | 12, 13     | 12, 13 | 11, 12, 13     | 12, 13 | 12, 13        | 13         | 13        | 13     | 12         | 12       | 12       | 11, 12     | 11       | 11       |        |        |        |
| D13S317       | 11, 12    | 11, 12   | 11, 12   | 11, 12   | 11, 12   | 8, 9       | 9        | 9        | 9, 12     | 9, 12  | 9, 12  | 11, 12    | 11, 12 | 11, 12 | 10, 11    | 10         | 10, 11     | 12, 13     | 12, 13 | 11, 12, 13     | 12, 13 | 11, 12, 13    | 11, 12     | 11, 12    | 11, 12 | 11, 12     | 11, 12   | 11, 12   | 11         | 10       | 10       | 10     |        |        |
| D7S820        | 7, 12     | 7, 12    | 7, 12    | 7, 12    | 7, 12    | 10, 11     | 11       | 11       | 10, 12    | 10, 12 | 10, 12 | 8, 11     | 8, 11  | 8, 11  | 9, 11     | 9, 11      | 9, 11      | 8, 10      | 8, 10  | 7, 8, 10, 12   | 8, 10  | 8, 10, 11     | 10, 11     | 10, 11    | 11     | 10, 12     | 10, 12   | 10, 12   | 10, 11     | 11       | 11       |        |        |        |
| D16S539       | 11, 12    | 12       | 12       | 12       | 12       | 9, 10      | 10       | 10       | 9, 11     | 9, 11  | 9, 11  | 11, 12    | 11     | 11     | 11, 12    | 11, 12     | 11, 12     | 11         | 11     | 11, 12         | 11     | 11, 12        | 12         | 12        | 12     | 9, 13      | 9, 13    | 13       | 12         | 12       | 12       |        |        |        |
| vWA           | 17, 18    | 17       | 17       | 17       | 17       | 14, 17     | 14       | 14       | 16        | 16     | 16, 17 | 16, 19    | 19     | 19     | 17, 18    | 18         | 18         | 17         | 17     | 17             | 17, 18 | 17, 18        | 15, 18     | 18        | 18     | 16, 17     | 16, 17   | 16       | 14, 16     | 14, 16   | 14, 16   |        |        |        |
| THO1          | 9, 9.3    | 9, 9.3   | 9, 9.3   | 9, 9.3   | 9, 9.3   | 9, 9.3     | 9, 9.3   | 9, 9.3   | 9, 9.3    | 9, 9.3 | 9, 9.3 | 7, 9.3    | 7, 9.3 | 7, 9.3 | 7, 8      | 7, 8       | 7, 8       | 9, 3       | 9, 3   | 9, 9, 3        | 9, 3   | 9, 9, 3       | 8, 9       | 9         | 9      | 8, 9       | 8, 9     | 8, 9     | 9, 9.3     | 9, 9.3   | 9, 9.3   |        |        |        |
| Amelogenin    | X         | X        | X        | X        | X        | X, Y       | X        | X        | X, Y      | X, Y   | X, Y   | X         | X      | X      | X         | X          | X          | X, Y       | X, Y   | X, Y           | X, Y   | X, Y          | X, Y       | X         | X      | X          | X        | X        | X          | X        | X, Y     | X, Y   | X, Y   |        |
| TPOX          | 8         | 8        | 8        | 8        | 8        | 11, 12     | 11, 12   | 11, 12   | 8, 10     | 8, 10  | 8, 10  | 10, 11    | 10, 11 | 10, 11 | 8         | 8          | 8          | 8          | 8      | 8              | 8      | 8, 9          | 8, 9       | 8, 9      | 8, 9   | 8          | 8        | 8        | 8, 9       | 8, 9     | 8, 9     |        |        |        |
| CSF1PO        | 10, 11    | 10       | 10       | 10       | 10       | 11, 12     | 11, 12   | 11, 12   | 11, 12    | 11, 12 | 11, 12 | 12, 15    | 12     | 12     | 11, 12    | 11, 12     | 11, 12     | 11, 13     | 11, 13 | 10, 11, 13     | 11, 13 | 9, 11, 13     | 9, 12, 13  | 9, 12, 13 | 9, 13  | 10, 12     | 10, 12   | 10       | 10, 12     | 10       | 10       |        |        |        |
| Percent Match |           | 100      | 100      | 100      | 100      |            | 91.7     | 91.7     |           | 95.4   | 91.3   |           | 100    | 100    |           | 89         | 89         |            | 100    | 60             | 92.8   | 81            |            | 100       | 100    |            | 100      | 100      |            | 100      | 100      |        |        |        |

### Supplemental Table 3: KEGG (Kyoto Encyclopedia of Genes and Genomes) Pathways

qValue positive log fold change

| geneset                                                   | URL                                                                                                                                                                                                                                         | size | qValue      | direction |
|-----------------------------------------------------------|---------------------------------------------------------------------------------------------------------------------------------------------------------------------------------------------------------------------------------------------|------|-------------|-----------|
| KEGG_ALLOGRAFT_REJECTION                                  | <a href="http://software.broadinstitute.org/gsea/msigdb/cards/KEGG_ALLOGRAFT_REJECTION">http://software.broadinstitute.org/gsea/msigdb/cards/KEGG_ALLOGRAFT_REJECTION</a>                                                                   | 27   | 0           | DOWN      |
| KEGG_ASTHMA                                               | <a href="http://software.broadinstitute.org/gsea/msigdb/cards/KEGG_ASTHMA">http://software.broadinstitute.org/gsea/msigdb/cards/KEGG_ASTHMA</a>                                                                                             | 15   | 0           | DOWN      |
| KEGG_AUTOIMMUNE_THYROID_DISEASE                           | <a href="http://software.broadinstitute.org/gsea/msigdb/cards/KEGG_AUTOIMMUNE_THYROID_DISEASE">http://software.broadinstitute.org/gsea/msigdb/cards/KEGG_AUTOIMMUNE_THYROID_DISEASE</a>                                                     | 29   | 0           | DOWN      |
| KEGG_CELL_ADHESION_MOLECULES_CAMS                         | <a href="http://software.broadinstitute.org/gsea/msigdb/cards/KEGG_CELL_ADHESION_MOLECULES_CAMS">http://software.broadinstitute.org/gsea/msigdb/cards/KEGG_CELL_ADHESION_MOLECULES_CAMS</a>                                                 | 122  | 0           | DOWN      |
| KEGG_CHEMOKINE_SIGNALING_PATHWAY                          | <a href="http://software.broadinstitute.org/gsea/msigdb/cards/KEGG_CHEMOKINE_SIGNALING_PATHWAY">http://software.broadinstitute.org/gsea/msigdb/cards/KEGG_CHEMOKINE_SIGNALING_PATHWAY</a>                                                   | 162  | 0           | DOWN      |
| KEGG_COMPLEMENT_AND_COAGULATION_CASCADES                  | <a href="http://software.broadinstitute.org/gsea/msigdb/cards/KEGG_COMPLEMENT_AND_COAGULATION_CASCADES">http://software.broadinstitute.org/gsea/msigdb/cards/KEGG_COMPLEMENT_AND_COAGULATION_CASCADES</a>                                   | 53   | 0           | DOWN      |
| KEGG_CYTOKINE_CYTOKINE_RECEPTOR_INTERACTION               | <a href="http://software.broadinstitute.org/gsea/msigdb/cards/KEGG_CYTOKINE_CYTOKINE_RECEPTOR_INTERACTION">http://software.broadinstitute.org/gsea/msigdb/cards/KEGG_CYTOKINE_CYTOKINE_RECEPTOR_INTERACTION</a>                             | 185  | 0           | DOWN      |
| KEGG_ECM_RECEPTOR_INTERACTION                             | <a href="http://software.broadinstitute.org/gsea/msigdb/cards/KEGG_ECM_RECEPTOR_INTERACTION">http://software.broadinstitute.org/gsea/msigdb/cards/KEGG_ECM_RECEPTOR_INTERACTION</a>                                                         | 77   | 0           | DOWN      |
| KEGG_GRAFT_VERSUS_HOST_DISEASE                            | <a href="http://software.broadinstitute.org/gsea/msigdb/cards/KEGG_GRAFT_VERSUS_HOST_DISEASE">http://software.broadinstitute.org/gsea/msigdb/cards/KEGG_GRAFT_VERSUS_HOST_DISEASE</a>                                                       | 30   | 0           | DOWN      |
| KEGG_HEMATOPOIETIC_CELL_LINEAGE                           | <a href="http://software.broadinstitute.org/gsea/msigdb/cards/KEGG_HEMATOPOIETIC_CELL_LINEAGE">http://software.broadinstitute.org/gsea/msigdb/cards/KEGG_HEMATOPOIETIC_CELL_LINEAGE</a>                                                     | 66   | 0           | DOWN      |
| KEGG_INTESTINAL_IMMUNE_NETWORK_FOR_IGA_PRODUCTION         | <a href="http://software.broadinstitute.org/gsea/msigdb/cards/KEGG_INTESTINAL_IMMUNE_NETWORK_FOR_IGA_PRODUCTION">http://software.broadinstitute.org/gsea/msigdb/cards/KEGG_INTESTINAL_IMMUNE_NETWORK_FOR_IGA_PRODUCTION</a>                 | 34   | 0           | DOWN      |
| KEGG_LEISHMANIA_INFECTION                                 | <a href="http://software.broadinstitute.org/gsea/msigdb/cards/KEGG_LEISHMANIA_INFECTION">http://software.broadinstitute.org/gsea/msigdb/cards/KEGG_LEISHMANIA_INFECTION</a>                                                                 | 66   | 0           | DOWN      |
| KEGG_NEUROACTIVE_LIGAND_RECEPTOR_INTERACTION              | <a href="http://software.broadinstitute.org/gsea/msigdb/cards/KEGG_NEUROACTIVE_LIGAND_RECEPTOR_INTERACTION">http://software.broadinstitute.org/gsea/msigdb/cards/KEGG_NEUROACTIVE_LIGAND_RECEPTOR_INTERACTION</a>                           | 148  | 0           | DOWN      |
| KEGG_TYPE_I_DIABETES_MELLITUS                             | <a href="http://software.broadinstitute.org/gsea/msigdb/cards/KEGG_TYPE_I_DIABETES_MELLITUS">http://software.broadinstitute.org/gsea/msigdb/cards/KEGG_TYPE_I_DIABETES_MELLITUS</a>                                                         | 34   | 0           | DOWN      |
| KEGG_VIRAL_MYOCARDITIS                                    | <a href="http://software.broadinstitute.org/gsea/msigdb/cards/KEGG_VIRAL_MYOCARDITIS">http://software.broadinstitute.org/gsea/msigdb/cards/KEGG_VIRAL_MYOCARDITIS</a>                                                                       | 58   | 0           | DOWN      |
| KEGG_FOCAL_ADHESION                                       | <a href="http://software.broadinstitute.org/gsea/msigdb/cards/KEGG_FOCAL_ADHESION">http://software.broadinstitute.org/gsea/msigdb/cards/KEGG_FOCAL_ADHESION</a>                                                                             | 185  | 8.27E-05    | DOWN      |
| KEGG_LEUKOCYTE_TRANSENDOTHELIAL_MIGRATION                 | <a href="http://software.broadinstitute.org/gsea/msigdb/cards/KEGG_LEUKOCYTE_TRANSENDOTHELIAL_MIGRATION">http://software.broadinstitute.org/gsea/msigdb/cards/KEGG_LEUKOCYTE_TRANSENDOTHELIAL_MIGRATION</a>                                 | 104  | 8.79E-05    | DOWN      |
| KEGG_PRIMARY_IMMUNODEFICIENCY                             | <a href="http://software.broadinstitute.org/gsea/msigdb/cards/KEGG_PRIMARY_IMMUNODEFICIENCY">http://software.broadinstitute.org/gsea/msigdb/cards/KEGG_PRIMARY_IMMUNODEFICIENCY</a>                                                         | 28   | 1.45E-04    | DOWN      |
| KEGG_ANTIGEN_PROCESSING_AND_PRESENTATION                  | <a href="http://software.broadinstitute.org/gsea/msigdb/cards/KEGG_ANTIGEN_PROCESSING_AND_PRESENTATION">http://software.broadinstitute.org/gsea/msigdb/cards/KEGG_ANTIGEN_PROCESSING_AND_PRESENTATION</a>                                   | 57   | 1.54E-04    | DOWN      |
| KEGG_CALCIIUM_SIGNALING_PATHWAY                           | <a href="http://software.broadinstitute.org/gsea/msigdb/cards/KEGG_CALCIIUM_SIGNALING_PATHWAY">http://software.broadinstitute.org/gsea/msigdb/cards/KEGG_CALCIIUM_SIGNALING_PATHWAY</a>                                                     | 137  | 1.99E-04    | DOWN      |
| KEGG_RIBOSOME                                             | <a href="http://software.broadinstitute.org/gsea/msigdb/cards/KEGG_RIBOSOME">http://software.broadinstitute.org/gsea/msigdb/cards/KEGG_RIBOSOME</a>                                                                                         | 84   | 7.14E-04    | UP        |
| KEGG_ALDOSTERONE_REGULATED_SODIUM_REABSORPTION            | <a href="http://software.broadinstitute.org/gsea/msigdb/cards/KEGG_ALDOSTERONE_REGULATED_SODIUM_REABSORPTION">http://software.broadinstitute.org/gsea/msigdb/cards/KEGG_ALDOSTERONE_REGULATED_SODIUM_REABSORPTION</a>                       | 35   | 0.002092255 | DOWN      |
| KEGG_VASCULAR_SMOOTH_MUSCLE_CONTRACTION                   | <a href="http://software.broadinstitute.org/gsea/msigdb/cards/KEGG_VASCULAR_SMOOTH_MUSCLE_CONTRACTION">http://software.broadinstitute.org/gsea/msigdb/cards/KEGG_VASCULAR_SMOOTH_MUSCLE_CONTRACTION</a>                                     | 92   | 0.011150197 | DOWN      |
| KEGG_AMINOACYL_TRNA_BIOSYNTHESIS                          | <a href="http://software.broadinstitute.org/gsea/msigdb/cards/KEGG_AMINOACYL_TRNA_BIOSYNTHESIS">http://software.broadinstitute.org/gsea/msigdb/cards/KEGG_AMINOACYL_TRNA_BIOSYNTHESIS</a>                                                   | 41   | 0.015030571 | UP        |
| KEGG_NATURAL_KILLER_CELL_MEDIATED_CYTOTOXICITY            | <a href="http://software.broadinstitute.org/gsea/msigdb/cards/KEGG_NATURAL_KILLER_CELL_MEDIATED_CYTOTOXICITY">http://software.broadinstitute.org/gsea/msigdb/cards/KEGG_NATURAL_KILLER_CELL_MEDIATED_CYTOTOXICITY</a>                       | 99   | 0.016282996 | DOWN      |
| KEGG_ARRHYTHMOGENIC_RIGHT_VENTRICULAR_CARDIOMYOPATHY_ARVC | <a href="http://software.broadinstitute.org/gsea/msigdb/cards/KEGG_ARRHYTHMOGENIC_RIGHT_VENTRICULAR_CARDIOMYOPATHY_ARVC">http://software.broadinstitute.org/gsea/msigdb/cards/KEGG_ARRHYTHMOGENIC_RIGHT_VENTRICULAR_CARDIOMYOPATHY_ARVC</a> | 63   | 0.019583456 | DOWN      |

qValue negative log fold change

| geneset                                    | URL                                                                                                                                                                                                           | size | qValue      | direction |
|--------------------------------------------|---------------------------------------------------------------------------------------------------------------------------------------------------------------------------------------------------------------|------|-------------|-----------|
| KEGG_ALZHEIMERS_DISEASE                    | <a href="http://software.broadinstitute.org/gsea/msigdb/cards/KEGG_ALZHEIMERS_DISEASE">http://software.broadinstitute.org/gsea/msigdb/cards/KEGG_ALZHEIMERS_DISEASE</a>                                       | 141  | 0           | DOWN      |
| KEGG_CELL_CYCLE                            | <a href="http://software.broadinstitute.org/gsea/msigdb/cards/KEGG_CELL_CYCLE">http://software.broadinstitute.org/gsea/msigdb/cards/KEGG_CELL_CYCLE</a>                                                       | 121  | 0           | DOWN      |
| KEGG_DNA_REPLICATION                       | <a href="http://software.broadinstitute.org/gsea/msigdb/cards/KEGG_DNA_REPLICATION">http://software.broadinstitute.org/gsea/msigdb/cards/KEGG_DNA_REPLICATION</a>                                             | 36   | 0           | DOWN      |
| KEGG_HUNTINGTONS_DISEASE                   | <a href="http://software.broadinstitute.org/gsea/msigdb/cards/KEGG_HUNTINGTONS_DISEASE">http://software.broadinstitute.org/gsea/msigdb/cards/KEGG_HUNTINGTONS_DISEASE</a>                                     | 155  | 0           | DOWN      |
| KEGG_OOCYTE_MEIOSIS                        | <a href="http://software.broadinstitute.org/gsea/msigdb/cards/KEGG_OOCYTE_MEIOSIS">http://software.broadinstitute.org/gsea/msigdb/cards/KEGG_OOCYTE_MEIOSIS</a>                                               | 100  | 0           | DOWN      |
| KEGG_PARKINSONS_DISEASE                    | <a href="http://software.broadinstitute.org/gsea/msigdb/cards/KEGG_PARKINSONS_DISEASE">http://software.broadinstitute.org/gsea/msigdb/cards/KEGG_PARKINSONS_DISEASE</a>                                       | 106  | 0           | DOWN      |
| KEGG_PATHOGENIC_ESCHERICHIA_COLI_INFECTION | <a href="http://software.broadinstitute.org/gsea/msigdb/cards/KEGG_PATHOGENIC_ESCHERICHIA_COLI_INFECTION">http://software.broadinstitute.org/gsea/msigdb/cards/KEGG_PATHOGENIC_ESCHERICHIA_COLI_INFECTION</a> | 53   | 0           | DOWN      |
| KEGG_PROTEASOME                            | <a href="http://software.broadinstitute.org/gsea/msigdb/cards/KEGG_PROTEASOME">http://software.broadinstitute.org/gsea/msigdb/cards/KEGG_PROTEASOME</a>                                                       | 41   | 0           | DOWN      |
| KEGG_STEROID_BIOSYNTHESIS                  | <a href="http://software.broadinstitute.org/gsea/msigdb/cards/KEGG_STEROID_BIOSYNTHESIS">http://software.broadinstitute.org/gsea/msigdb/cards/KEGG_STEROID_BIOSYNTHESIS</a>                                   | 16   | 0           | DOWN      |
| KEGG_SYSTEMIC_LUPUS_ERYTHEMATOSUS          | <a href="http://software.broadinstitute.org/gsea/msigdb/cards/KEGG_SYSTEMIC_LUPUS_ERYTHEMATOSUS">http://software.broadinstitute.org/gsea/msigdb/cards/KEGG_SYSTEMIC_LUPUS_ERYTHEMATOSUS</a>                   | 112  | 0           | DOWN      |
| KEGG_REGULATION_OF_ACTIN_CYTOSKELETON      | <a href="http://software.broadinstitute.org/gsea/msigdb/cards/KEGG_REGULATION_OF_ACTIN_CYTOSKELETON">http://software.broadinstitute.org/gsea/msigdb/cards/KEGG_REGULATION_OF_ACTIN_CYTOSKELETON</a>           | 184  | 3.79E-04    | DOWN      |
| KEGG_P53_SIGNALING_PATHWAY                 | <a href="http://software.broadinstitute.org/gsea/msigdb/cards/KEGG_P53_SIGNALING_PATHWAY">http://software.broadinstitute.org/gsea/msigdb/cards/KEGG_P53_SIGNALING_PATHWAY</a>                                 | 66   | 5.83E-04    | DOWN      |
| KEGG_PATHWAYS_IN_CANCER                    | <a href="http://software.broadinstitute.org/gsea/msigdb/cards/KEGG_PATHWAYS_IN_CANCER">http://software.broadinstitute.org/gsea/msigdb/cards/KEGG_PATHWAYS_IN_CANCER</a>                                       | 293  | 0.006809834 | DOWN      |
